# Supplementary material for: A geminivirus betasatellite encoded βC1 protein interacts with PsbP and subverts PsbP‐mediated antiviral defence in plants
Source: PubMed Central journal article supplement (PMC6589724; doi:10.1111/mpp.12804), 2019-04-15

**Figure S5**

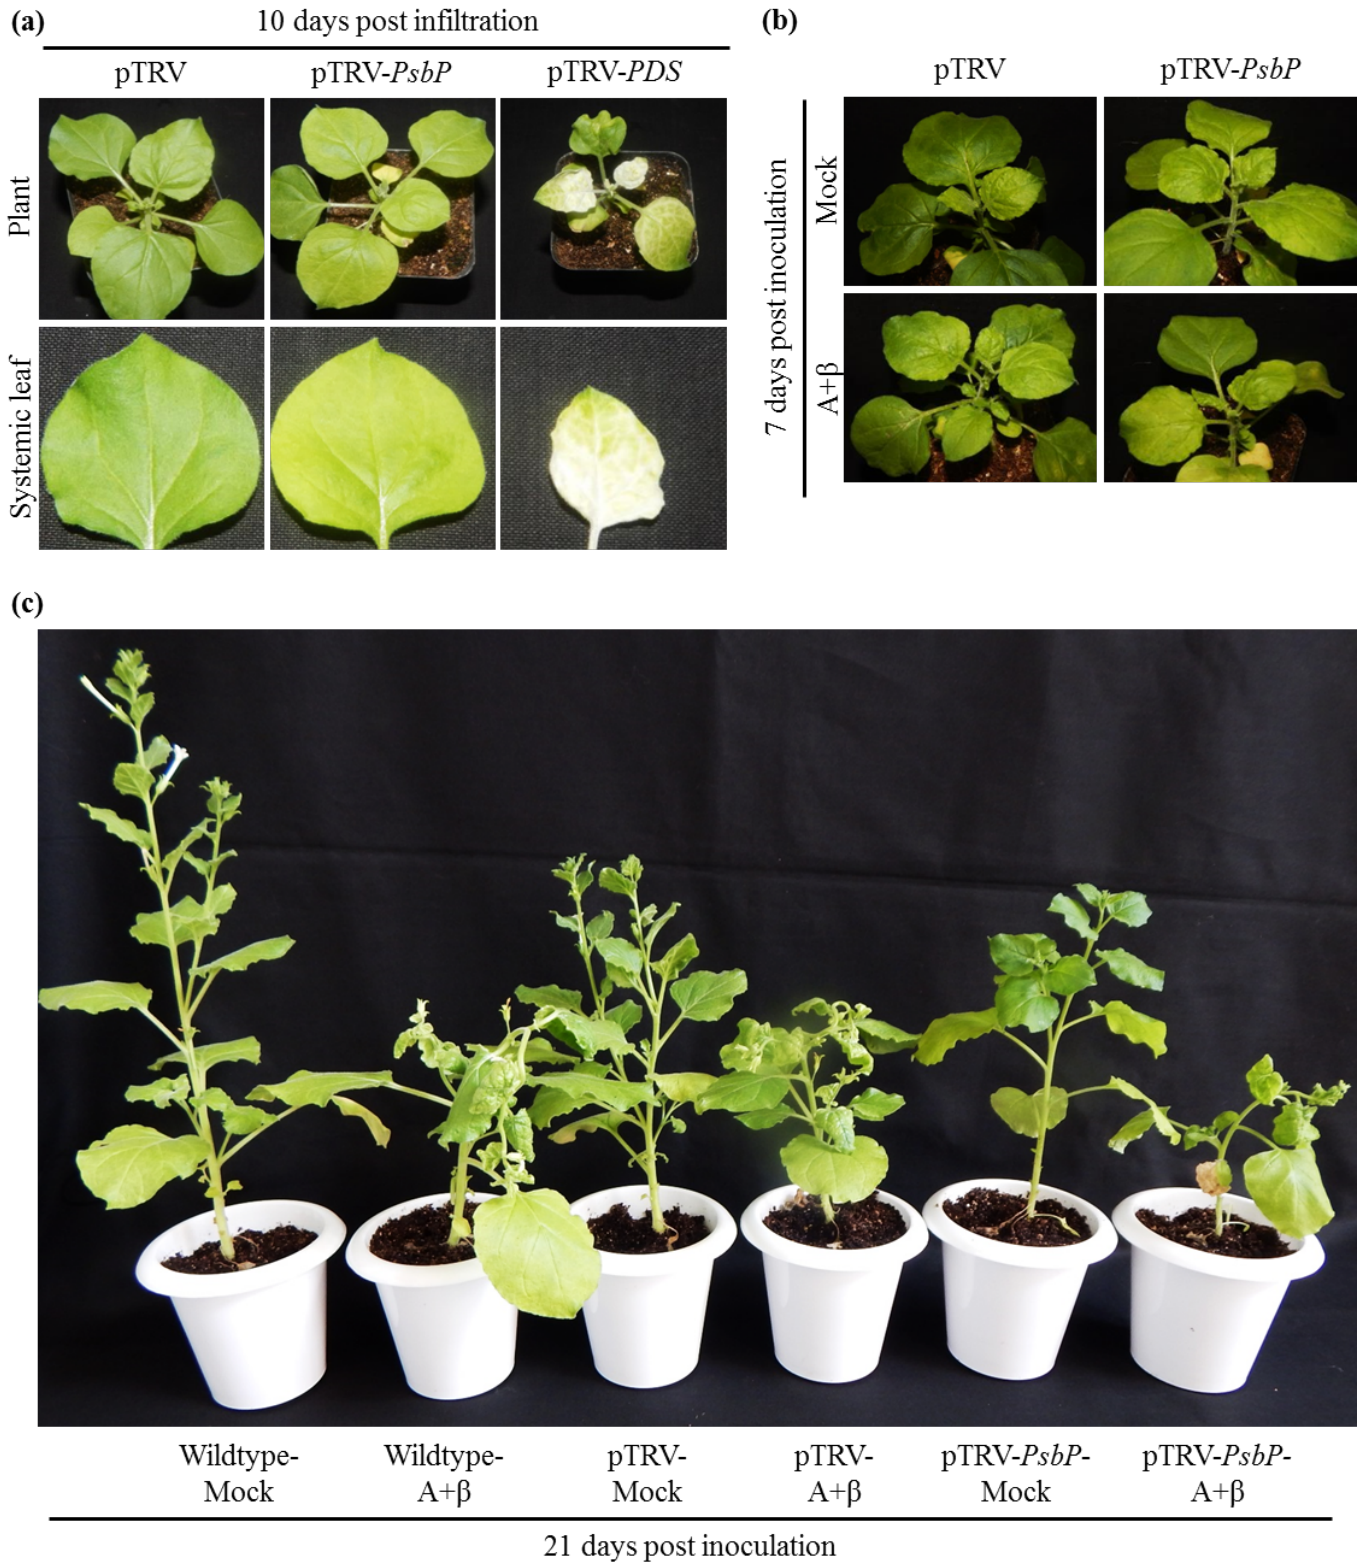

Supplement: MPP-20-943-s005.pdf [file MPP-20-943-s005.pdf]
